# Supplementary material for: Sustainable synthesis of activated porous carbon from lignin for enhanced CO2 capture: a comparative study of physicochemical activation routes
Source: Royal Society of Chemistry journal article supplement (doi:10.1039/d4ya00305e), 2024-01-01
Supplement: d4ya00305e1.pdf [file d4ya00305e1.pdf]

## Sustainable synthesis of activated porous carbon from lignin for enhanced CO<sub>2</sub> capture: A comparative study of physicochemical activation routes

Himanshu Patel,<sup>ab</sup> Amar Mohanty,<sup>ab</sup> Manjusri Misra<sup>\*ab</sup>

<sup>a</sup> Bioproducts Discovery and Development Centre, Department of Plant Agriculture, University of Guelph, Crop Science Building, Guelph, Ontario N1G 2W1, Canada

<sup>b</sup> School of Engineering, University of Guelph, Thornbrough Building, 80 South Ring Road E, Guelph, Ontario N1G 2W1, Canada

\* E-mail addresses: [mmisra@uoguelph.ca](mailto:mmisra@uoguelph.ca) (M. Misra)

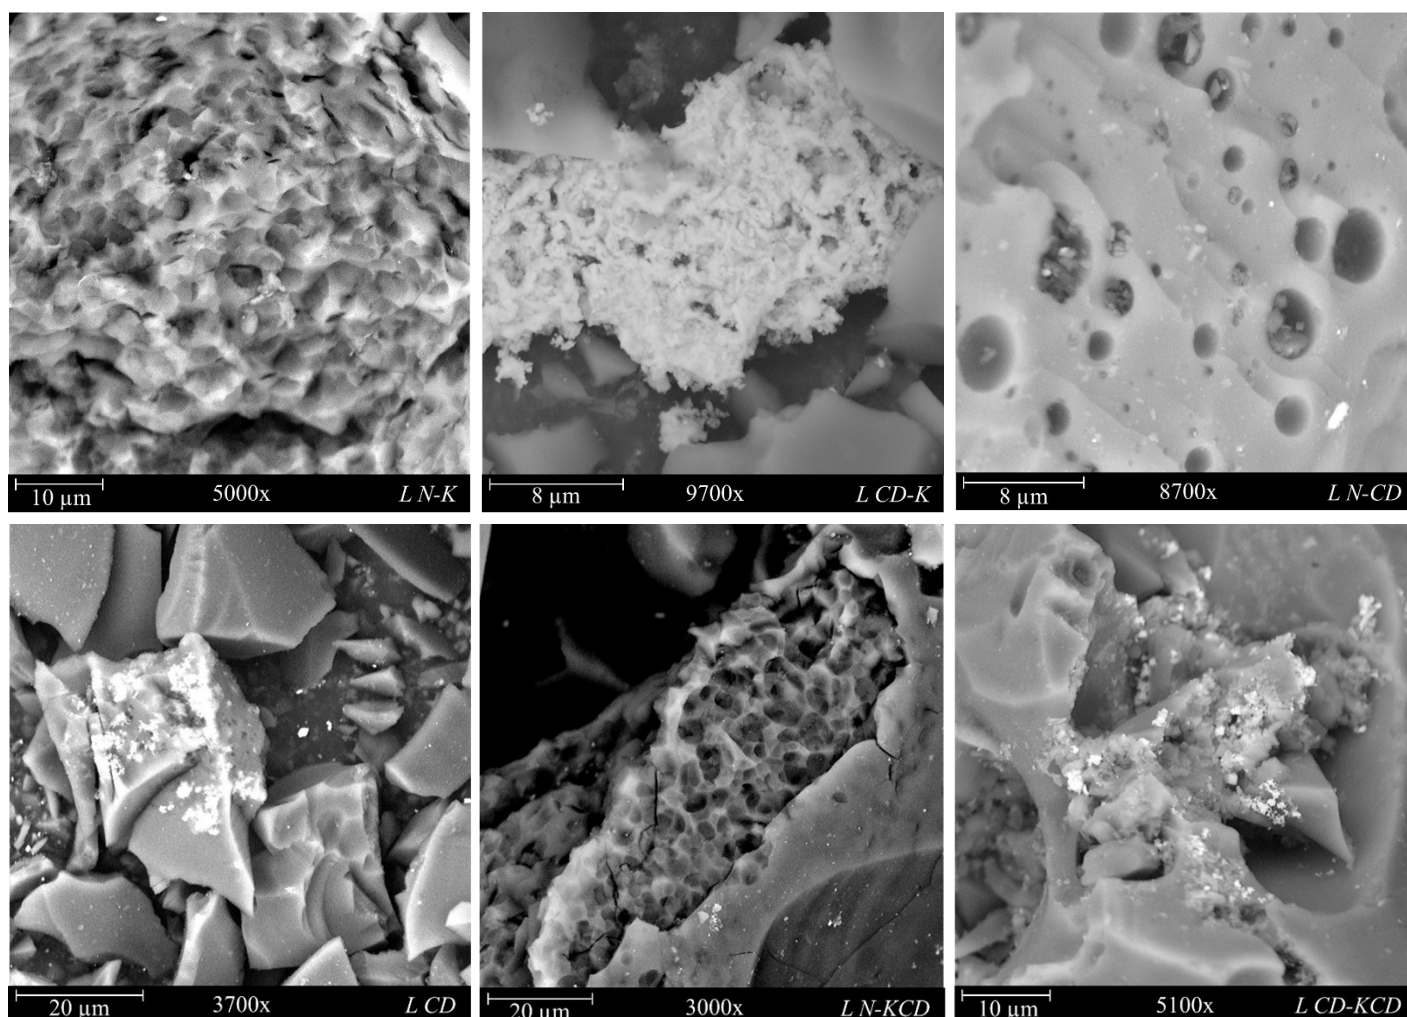

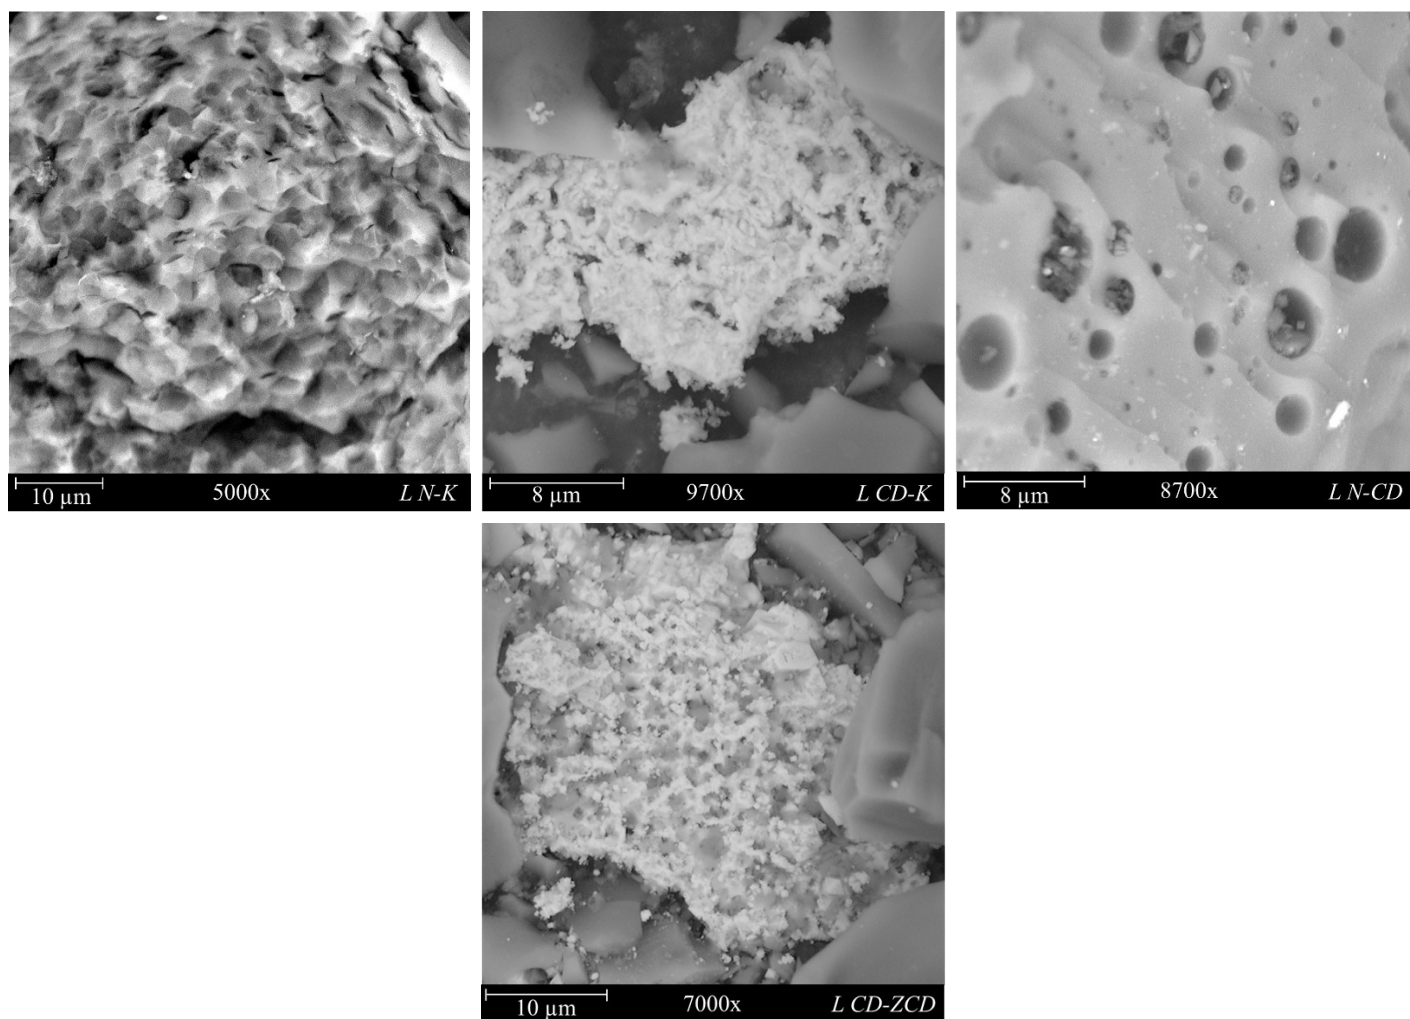

**Figure S1.** Scanning electron micrographs of lignin protobind 2400 based activated carbons.

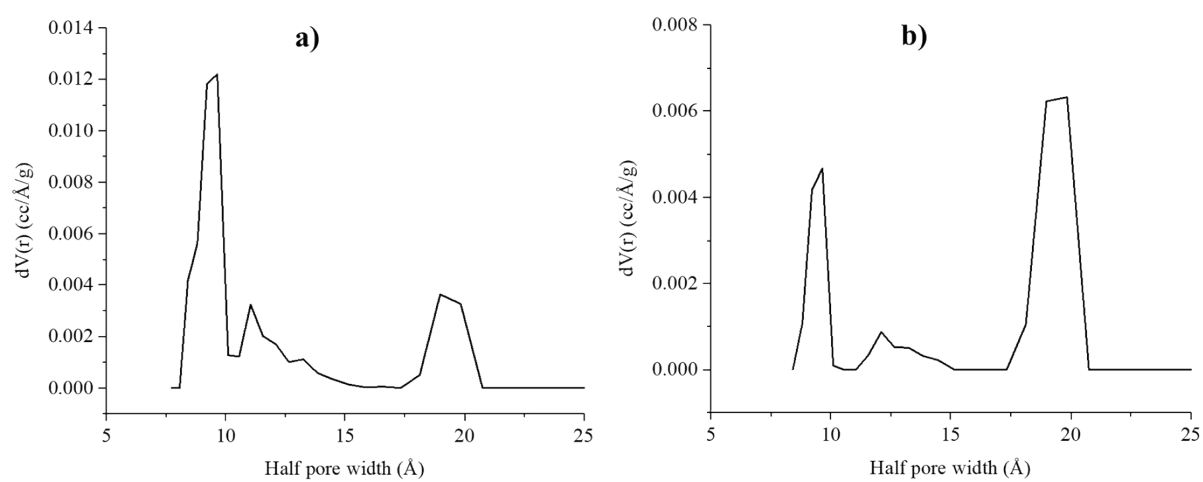

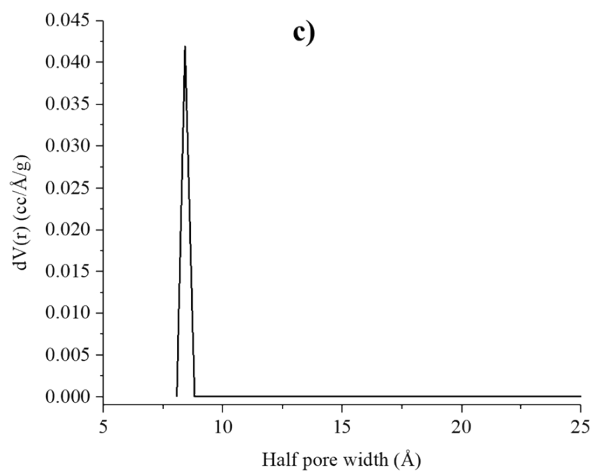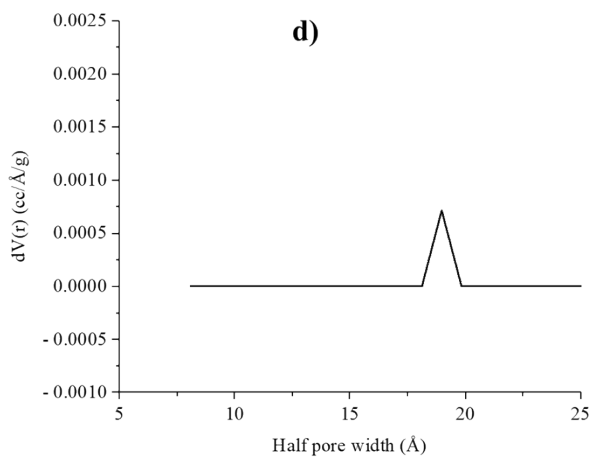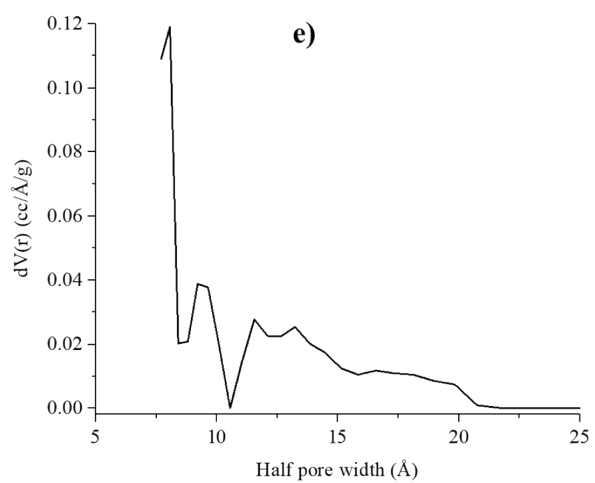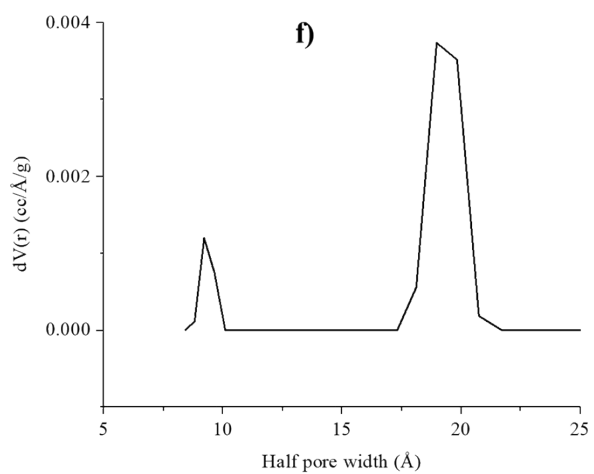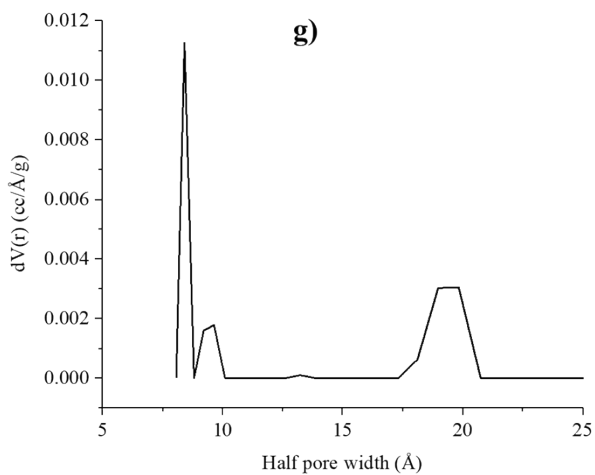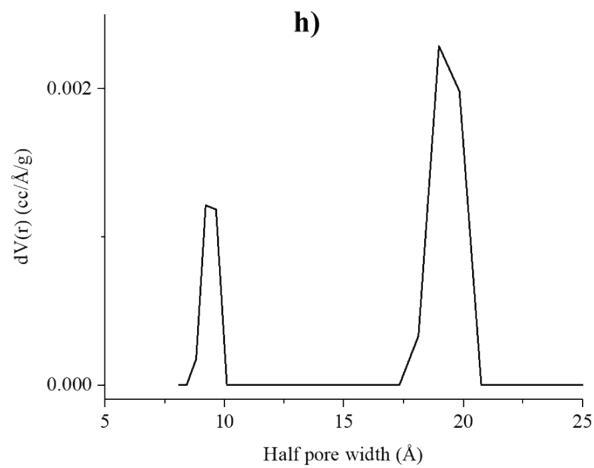

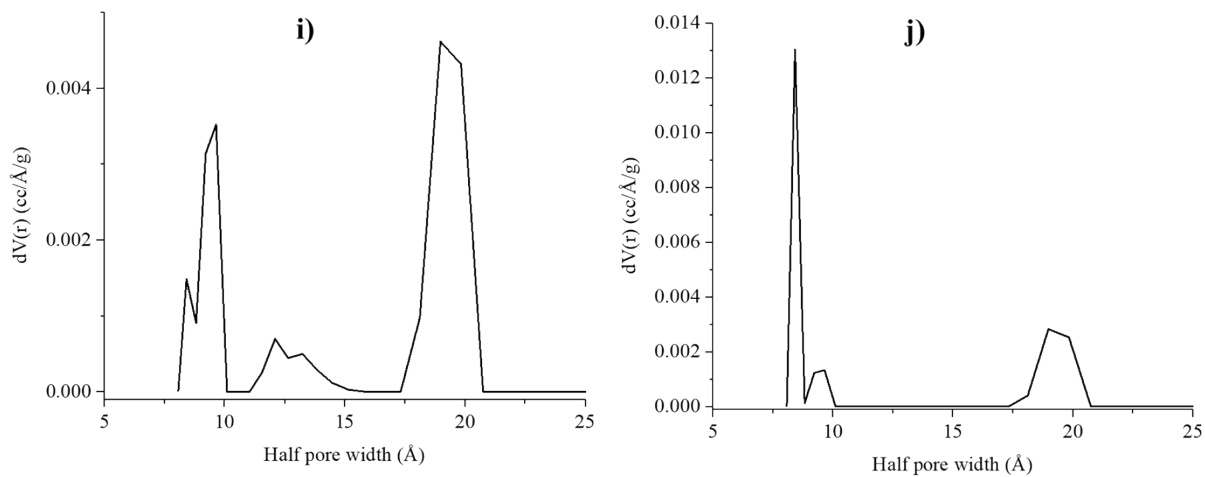

**Figure S2.** Pore size distribution from NLDFIT method using N<sub>2</sub> isotherms at -196 °C for (a) *L N-K*, (b) *L CD-K*, (c) *L N-CD*, (d) *L CD*, (e) *L N-KCD*, (f) *L CD-KCD*, (g) *L N-Z*, (h) *L CD-Z*, (i) *L N-ZCD*, and (j) *L CD-ZCD*.

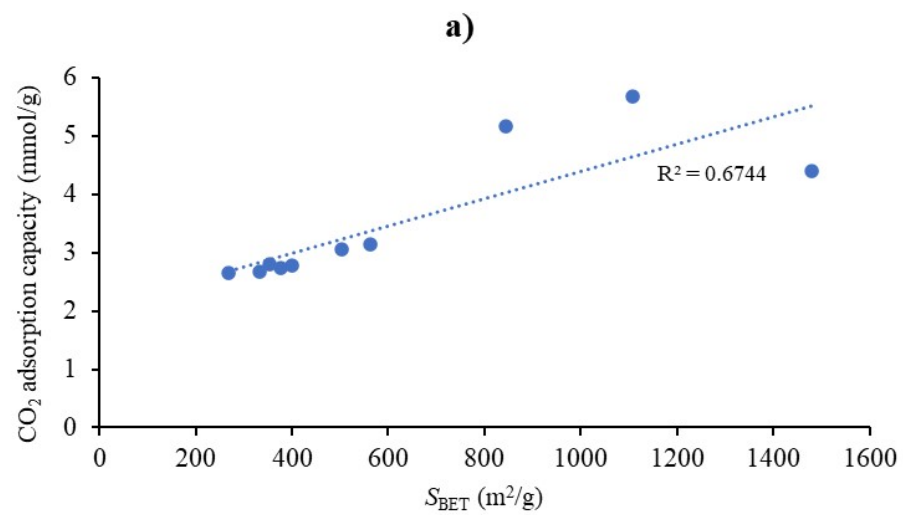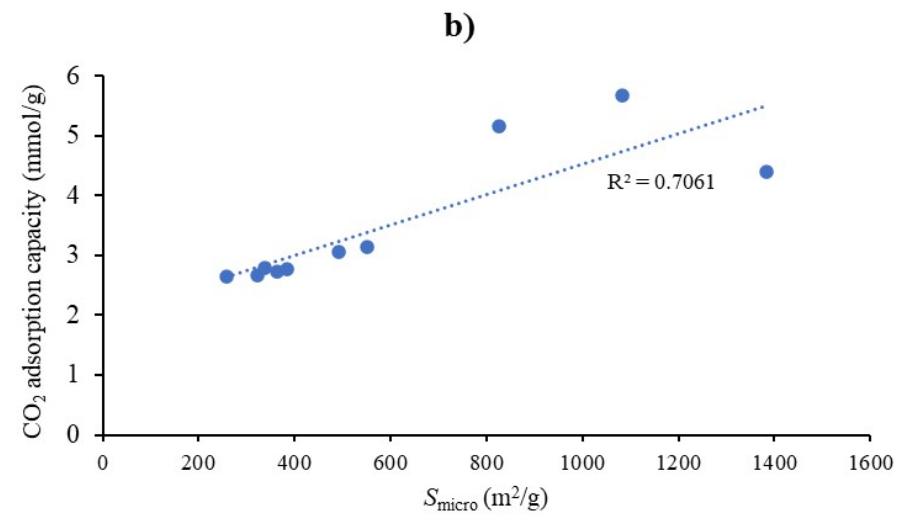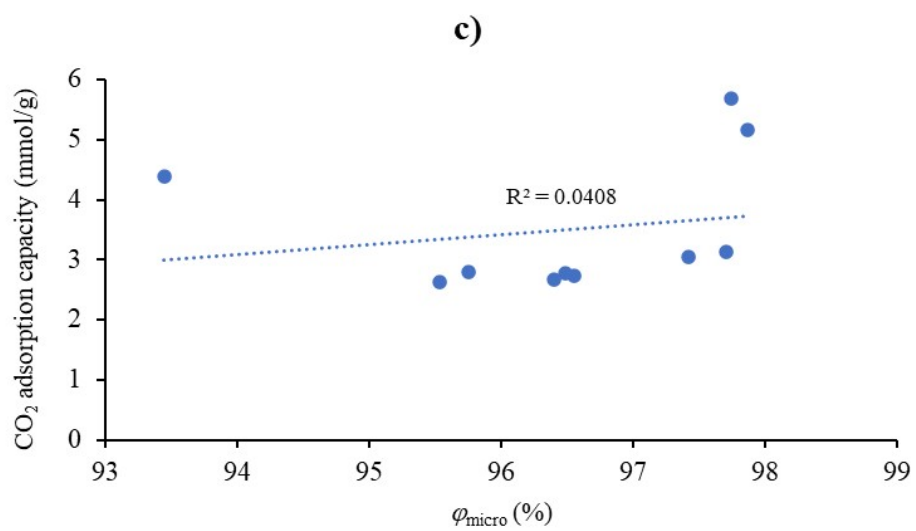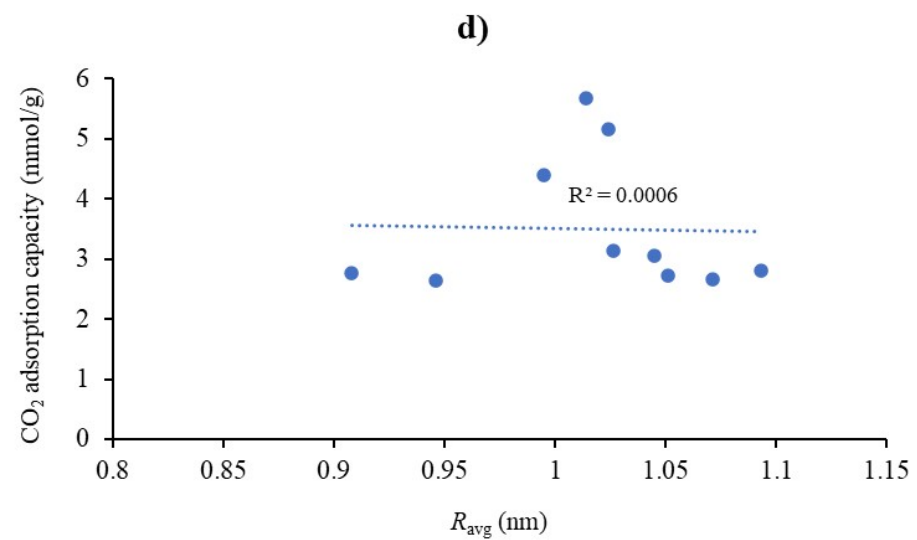

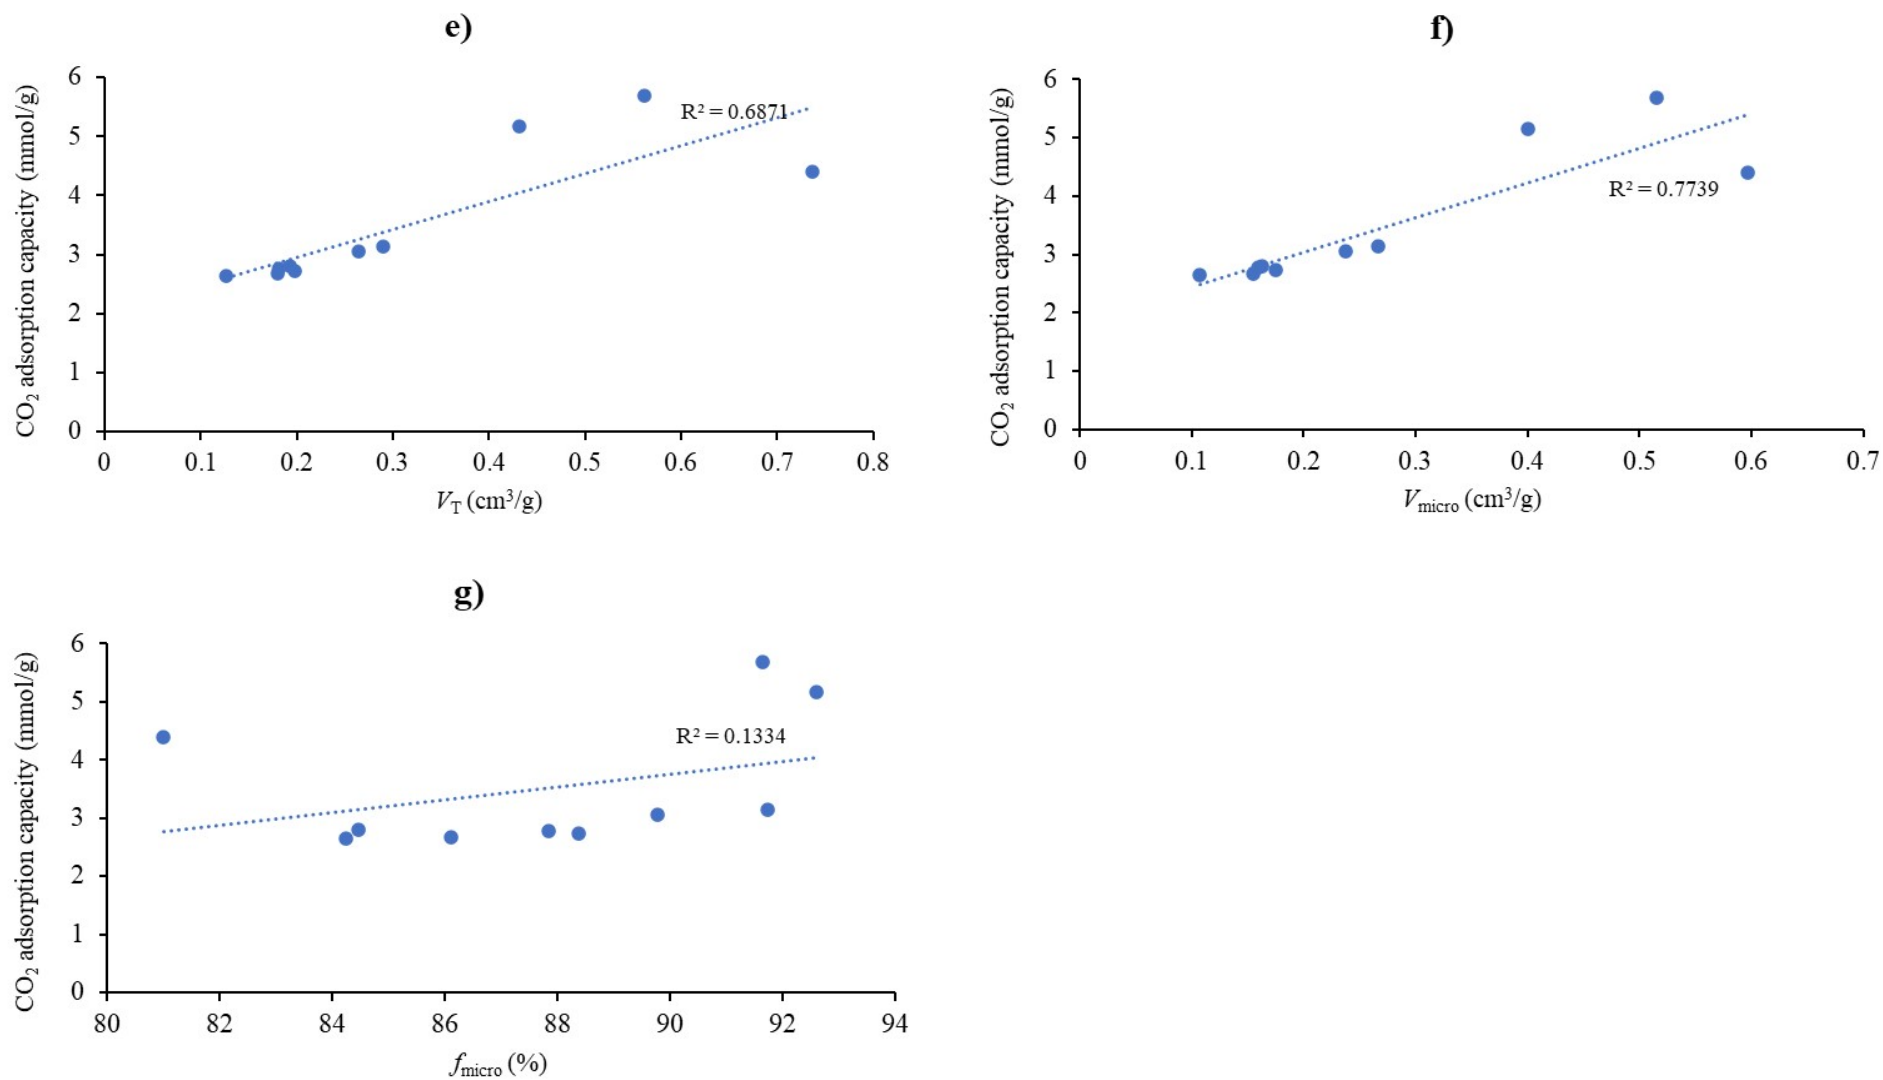

**Figure S3.** Linear relation between each textural property (a)  $S_{\text{BET}}$ , (b)  $S_{\text{micro}}$ , (c)  $\phi_{\text{micro}}$ , (d)  $R_{\text{avg}}$ , (e)  $V_T$ , (f)  $V_{\text{micro}}$ , and (g)  $f_{\text{micro}}$  versus CO<sub>2</sub> adsorption capacity at 0 °C/1 bar.
